# Supplementary material for: Exosome Structures Supported by Machine Learning Can Be Used as a Promising Diagnostic Tool
Source: MDPI journal article supplement (doi:10.3390/ma15227967), 2022-11-11

Plot of X, Y, Z vs T.

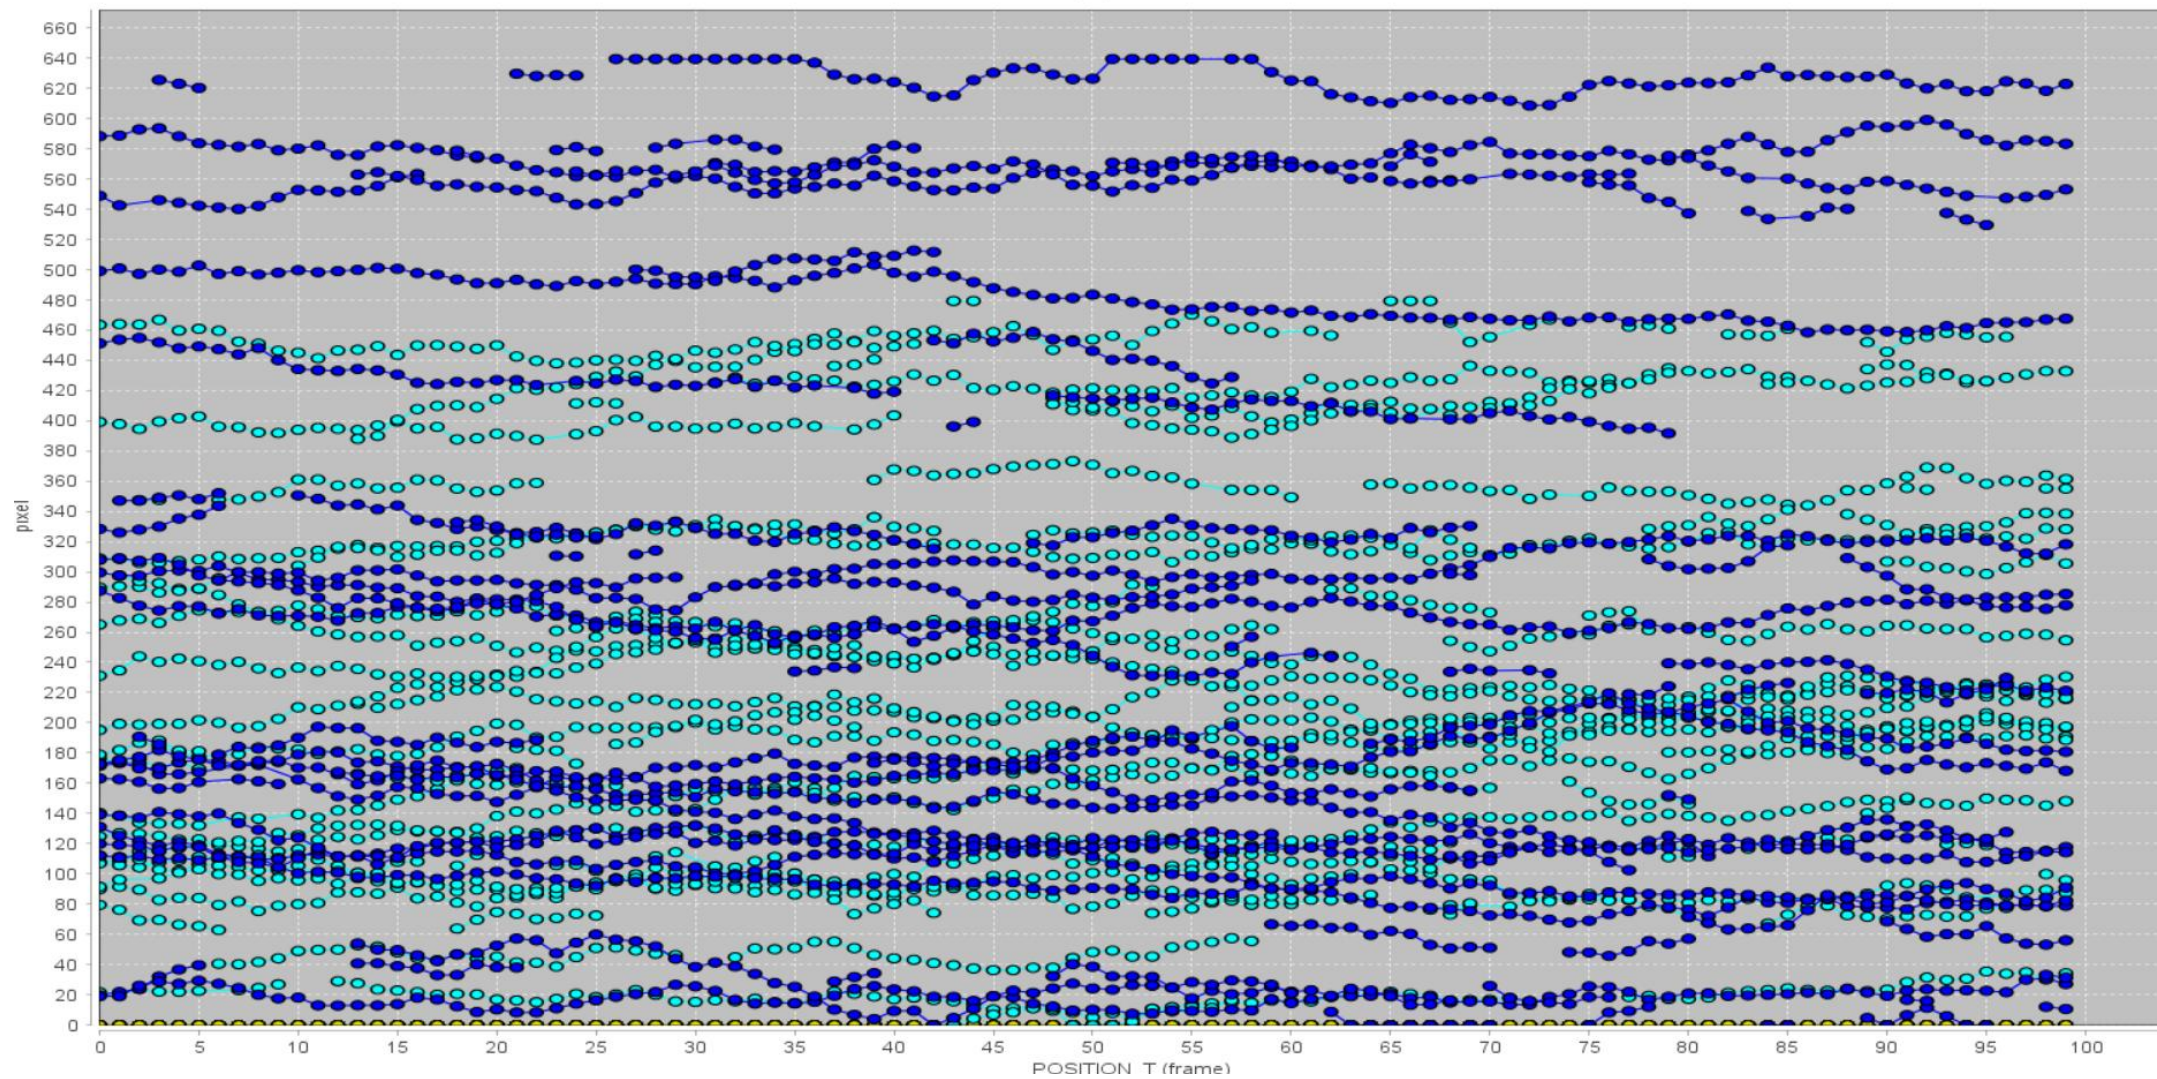



Plot of Z Location (mean), X Location (mean), Y Location (mean) vs Duration of track.

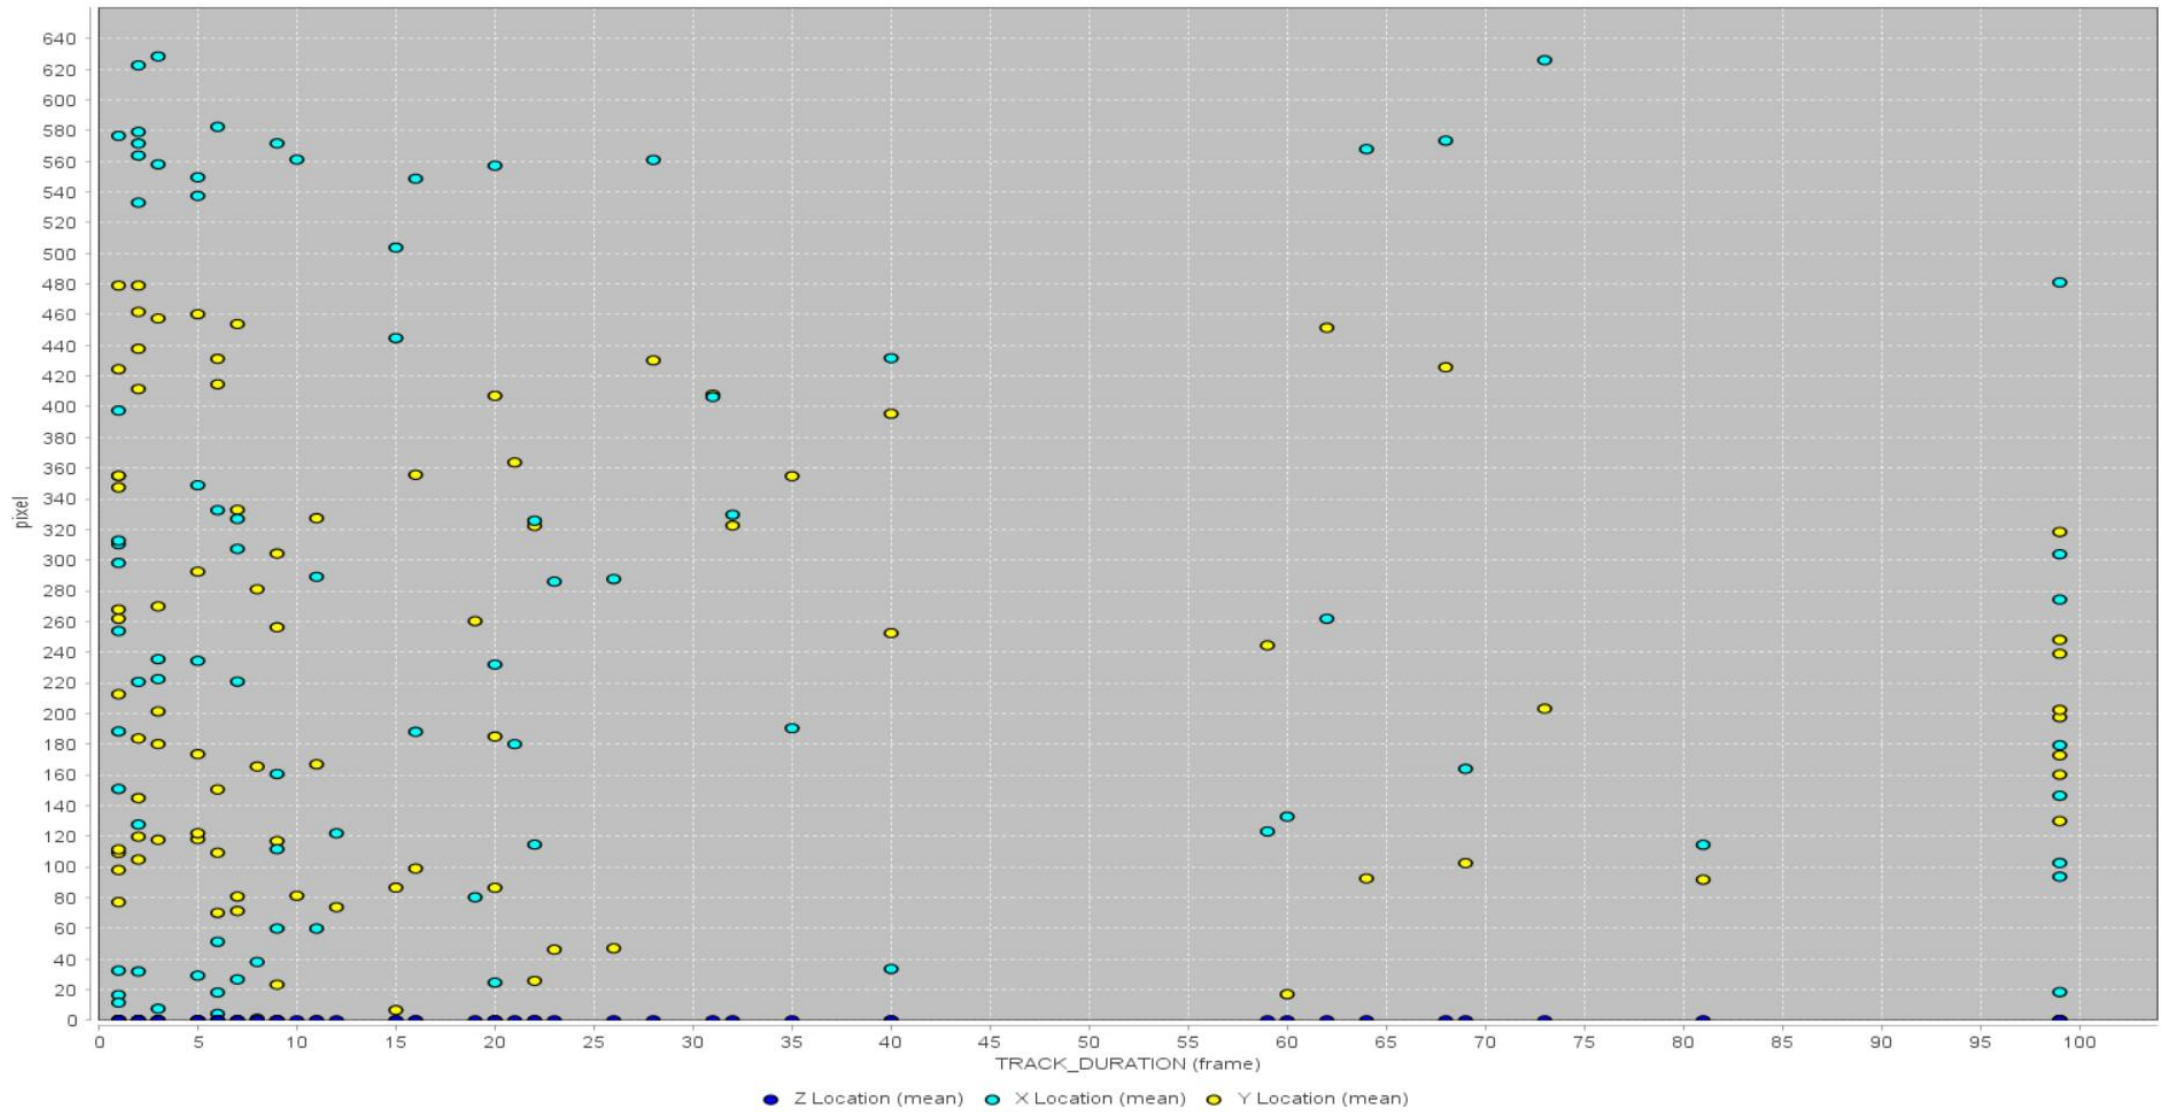

Plot of Track displacement vs Duration of track.

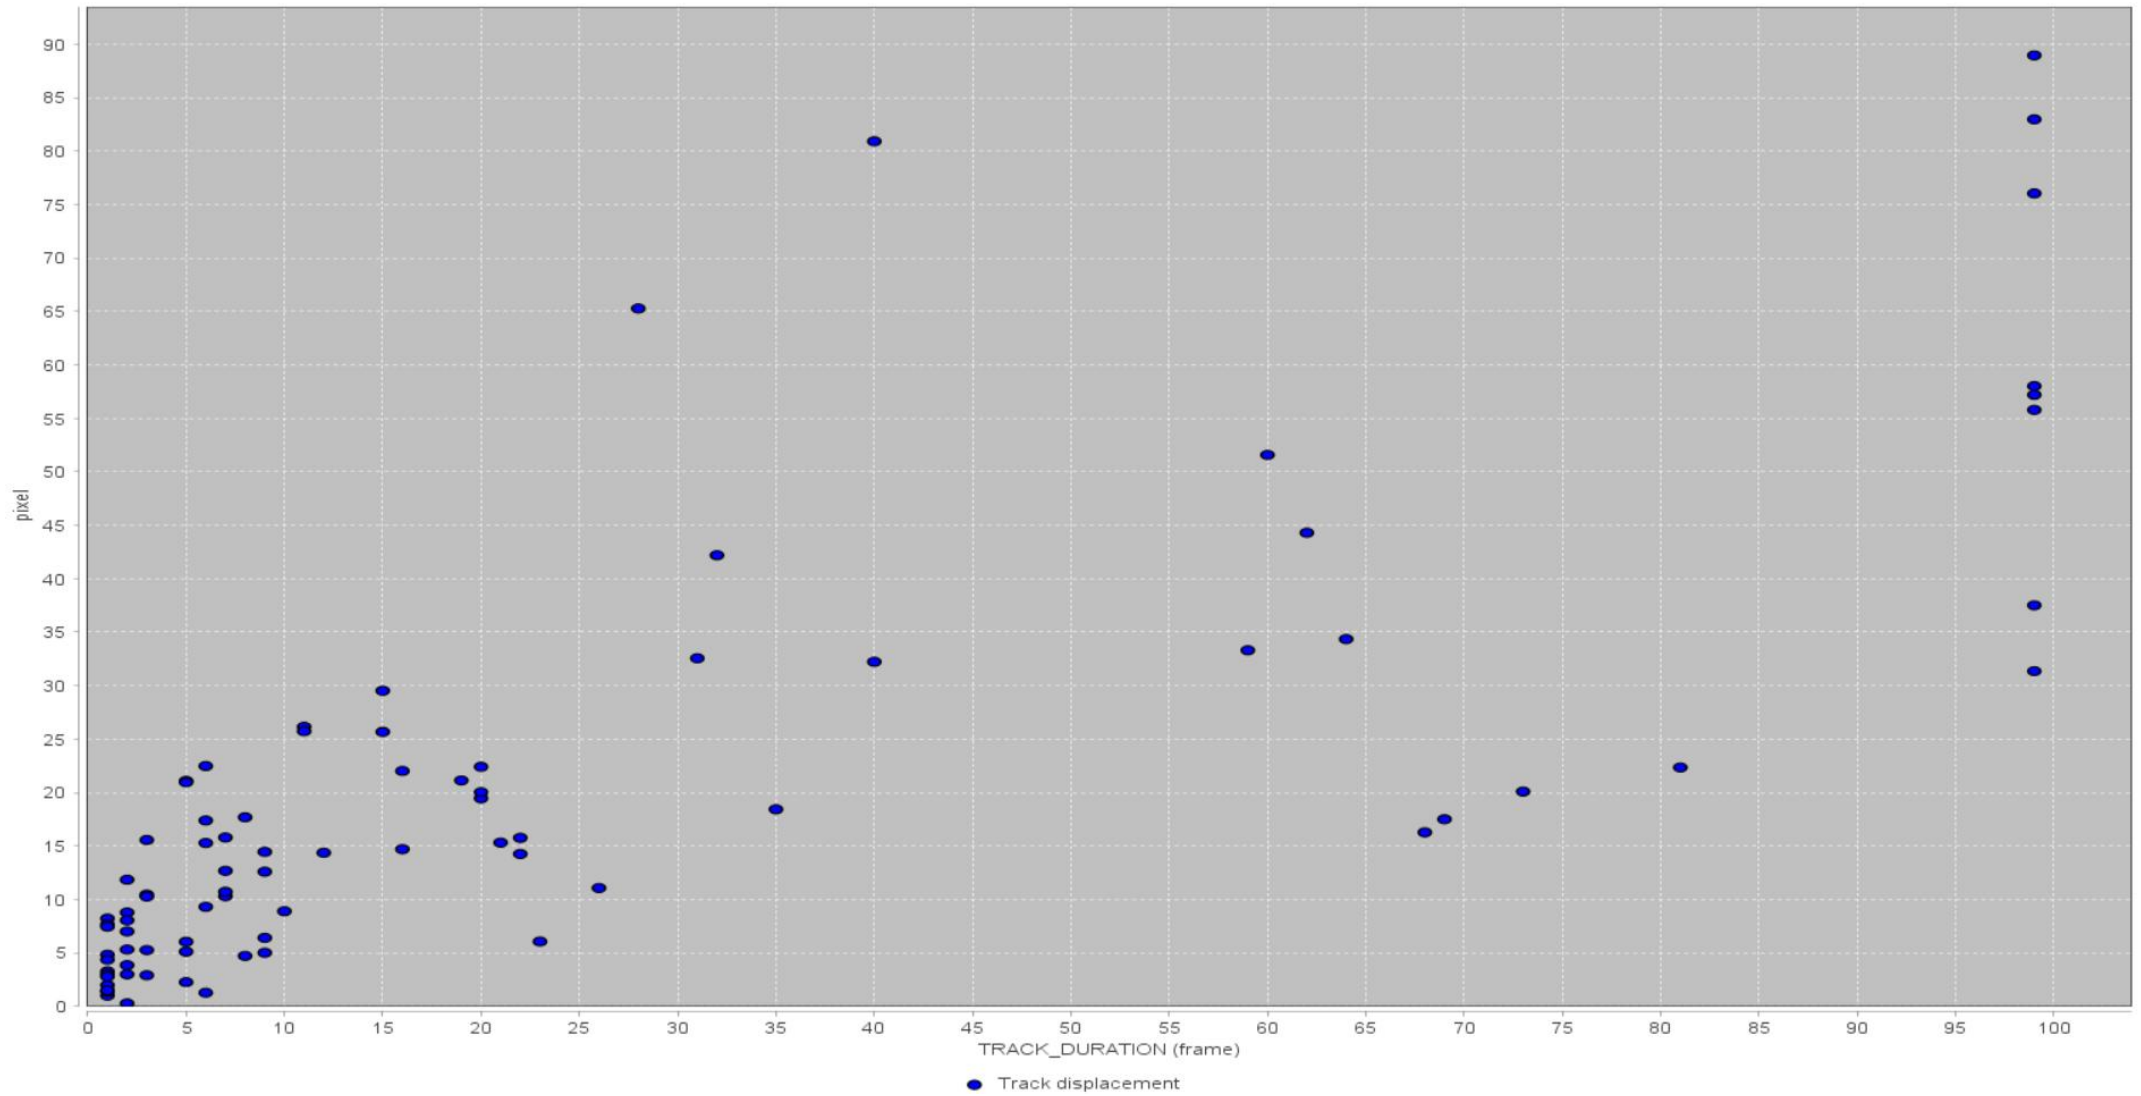

Plot of Complex points, Number of merge events, Number of split events vs Duration of track.

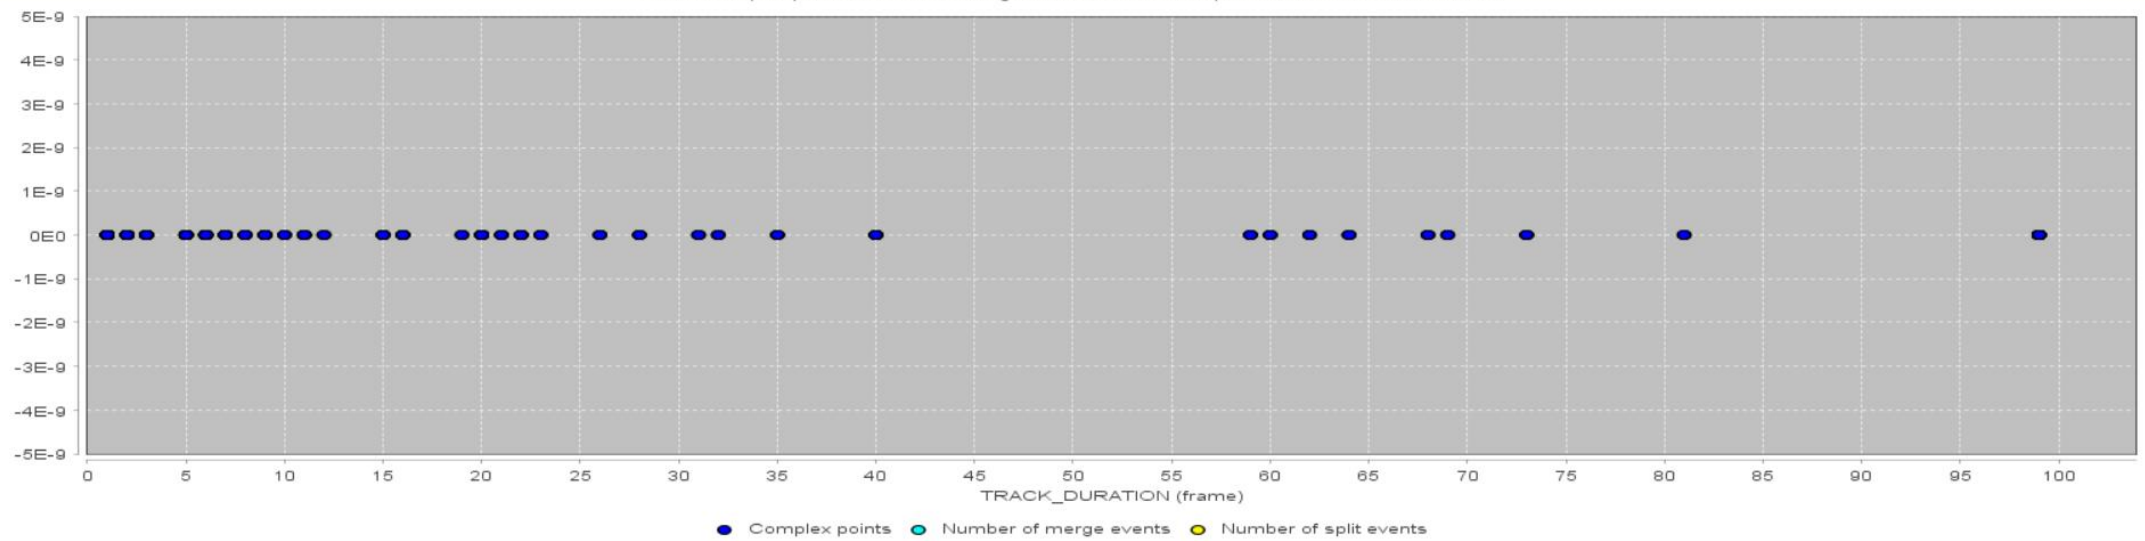

Plot of Z Location (mean) vs Duration of track.

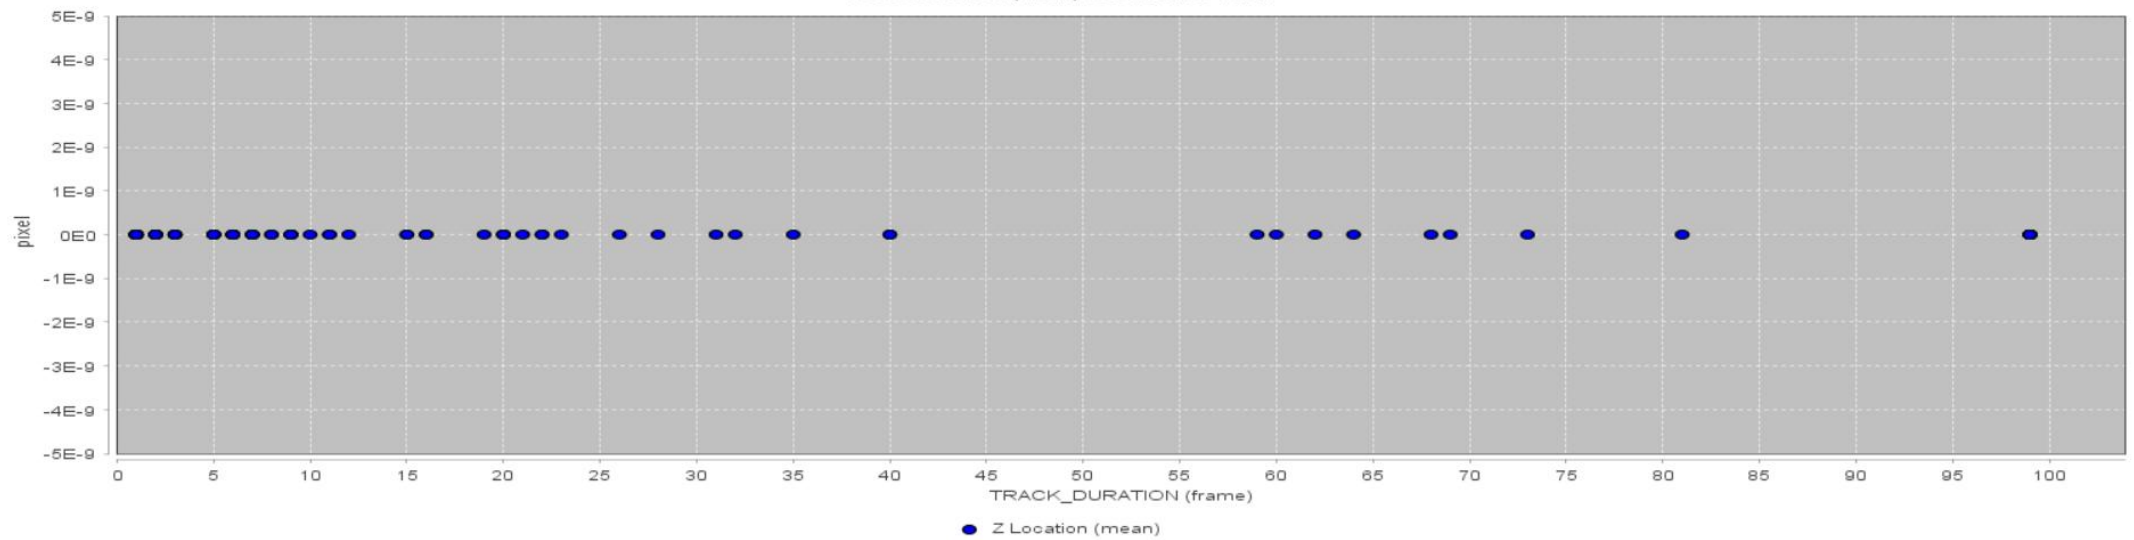

Plot of Z Location (mean), Y Location (mean) vs X Location (mean).

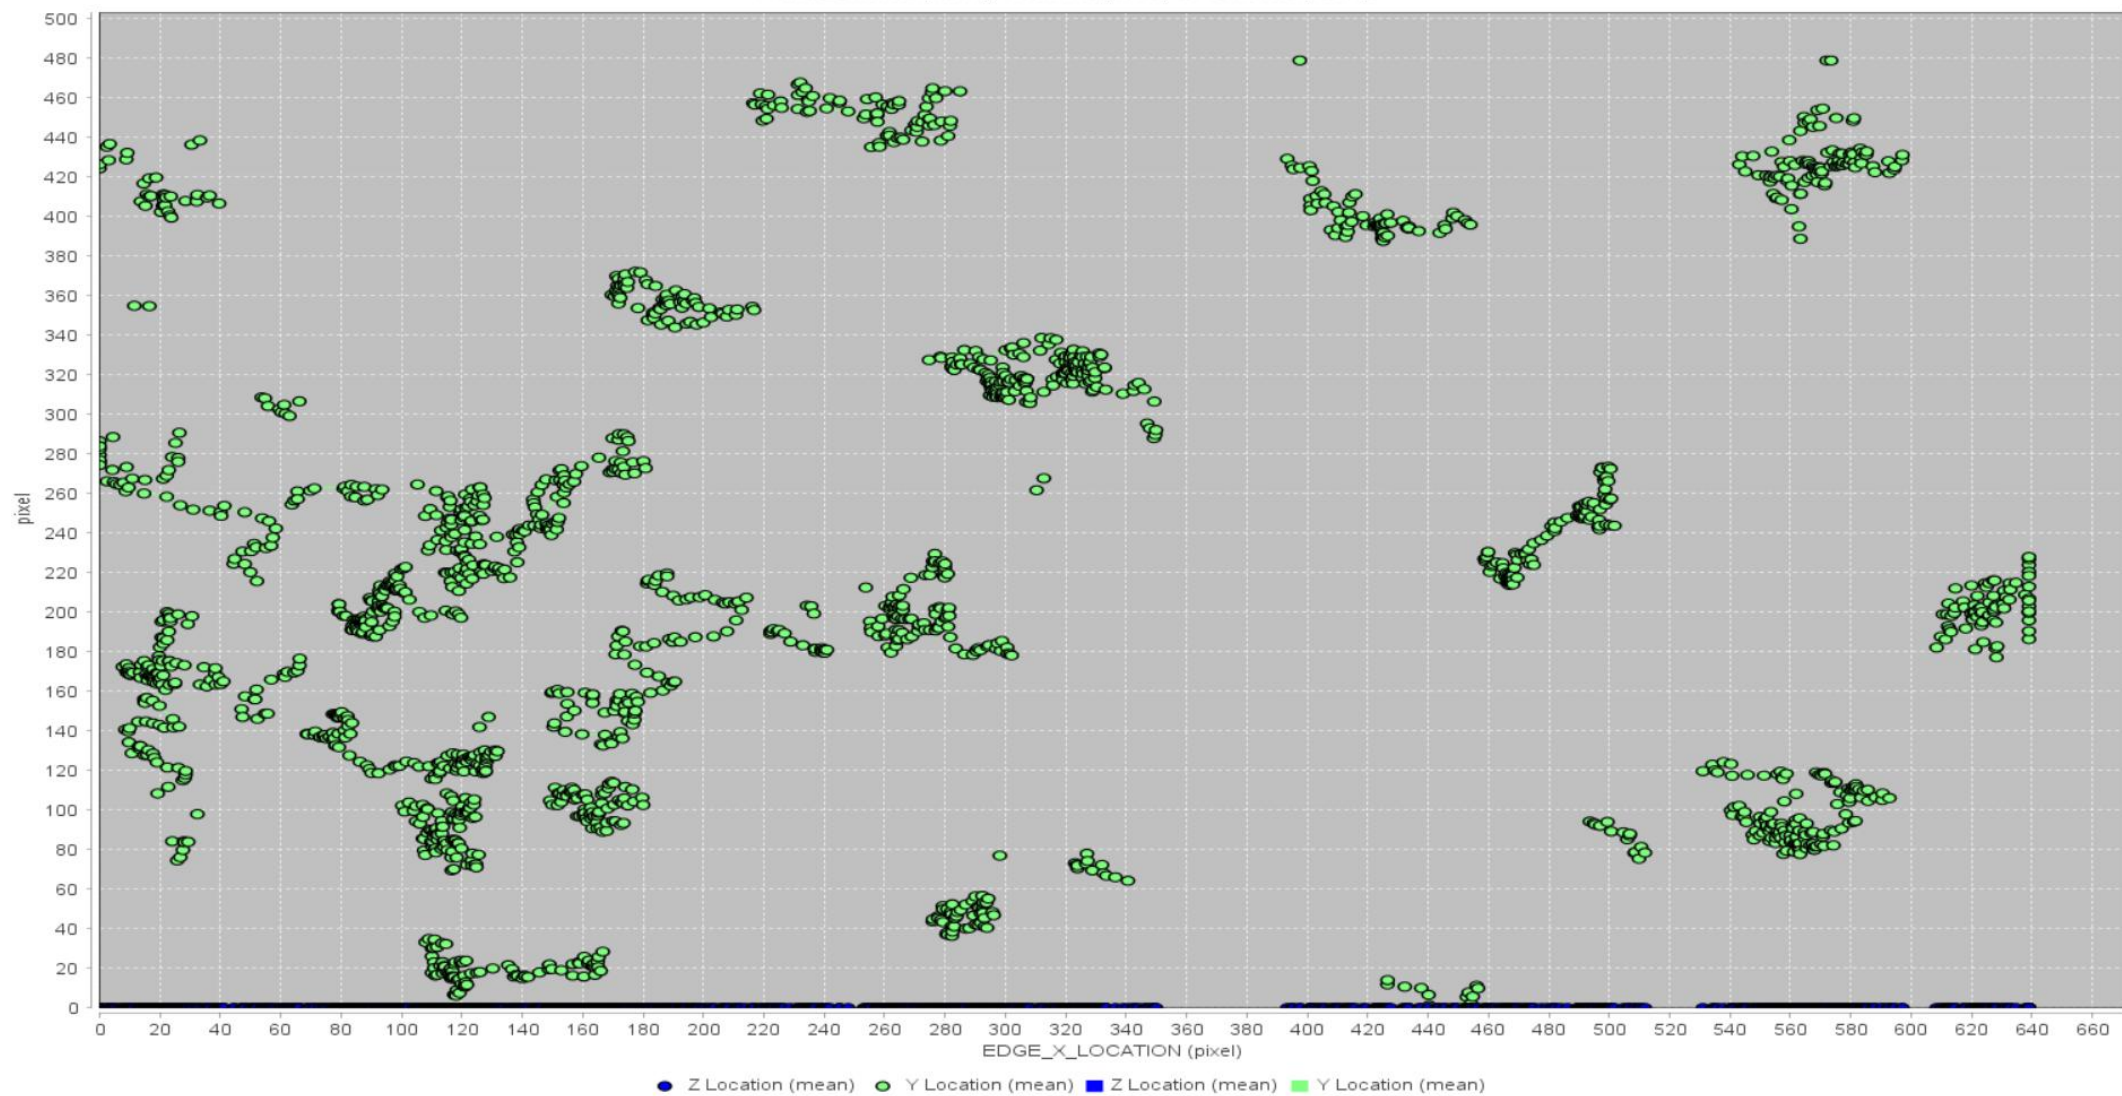



Plot of Z Location (mean), X Location (mean) vs Y Location (mean).

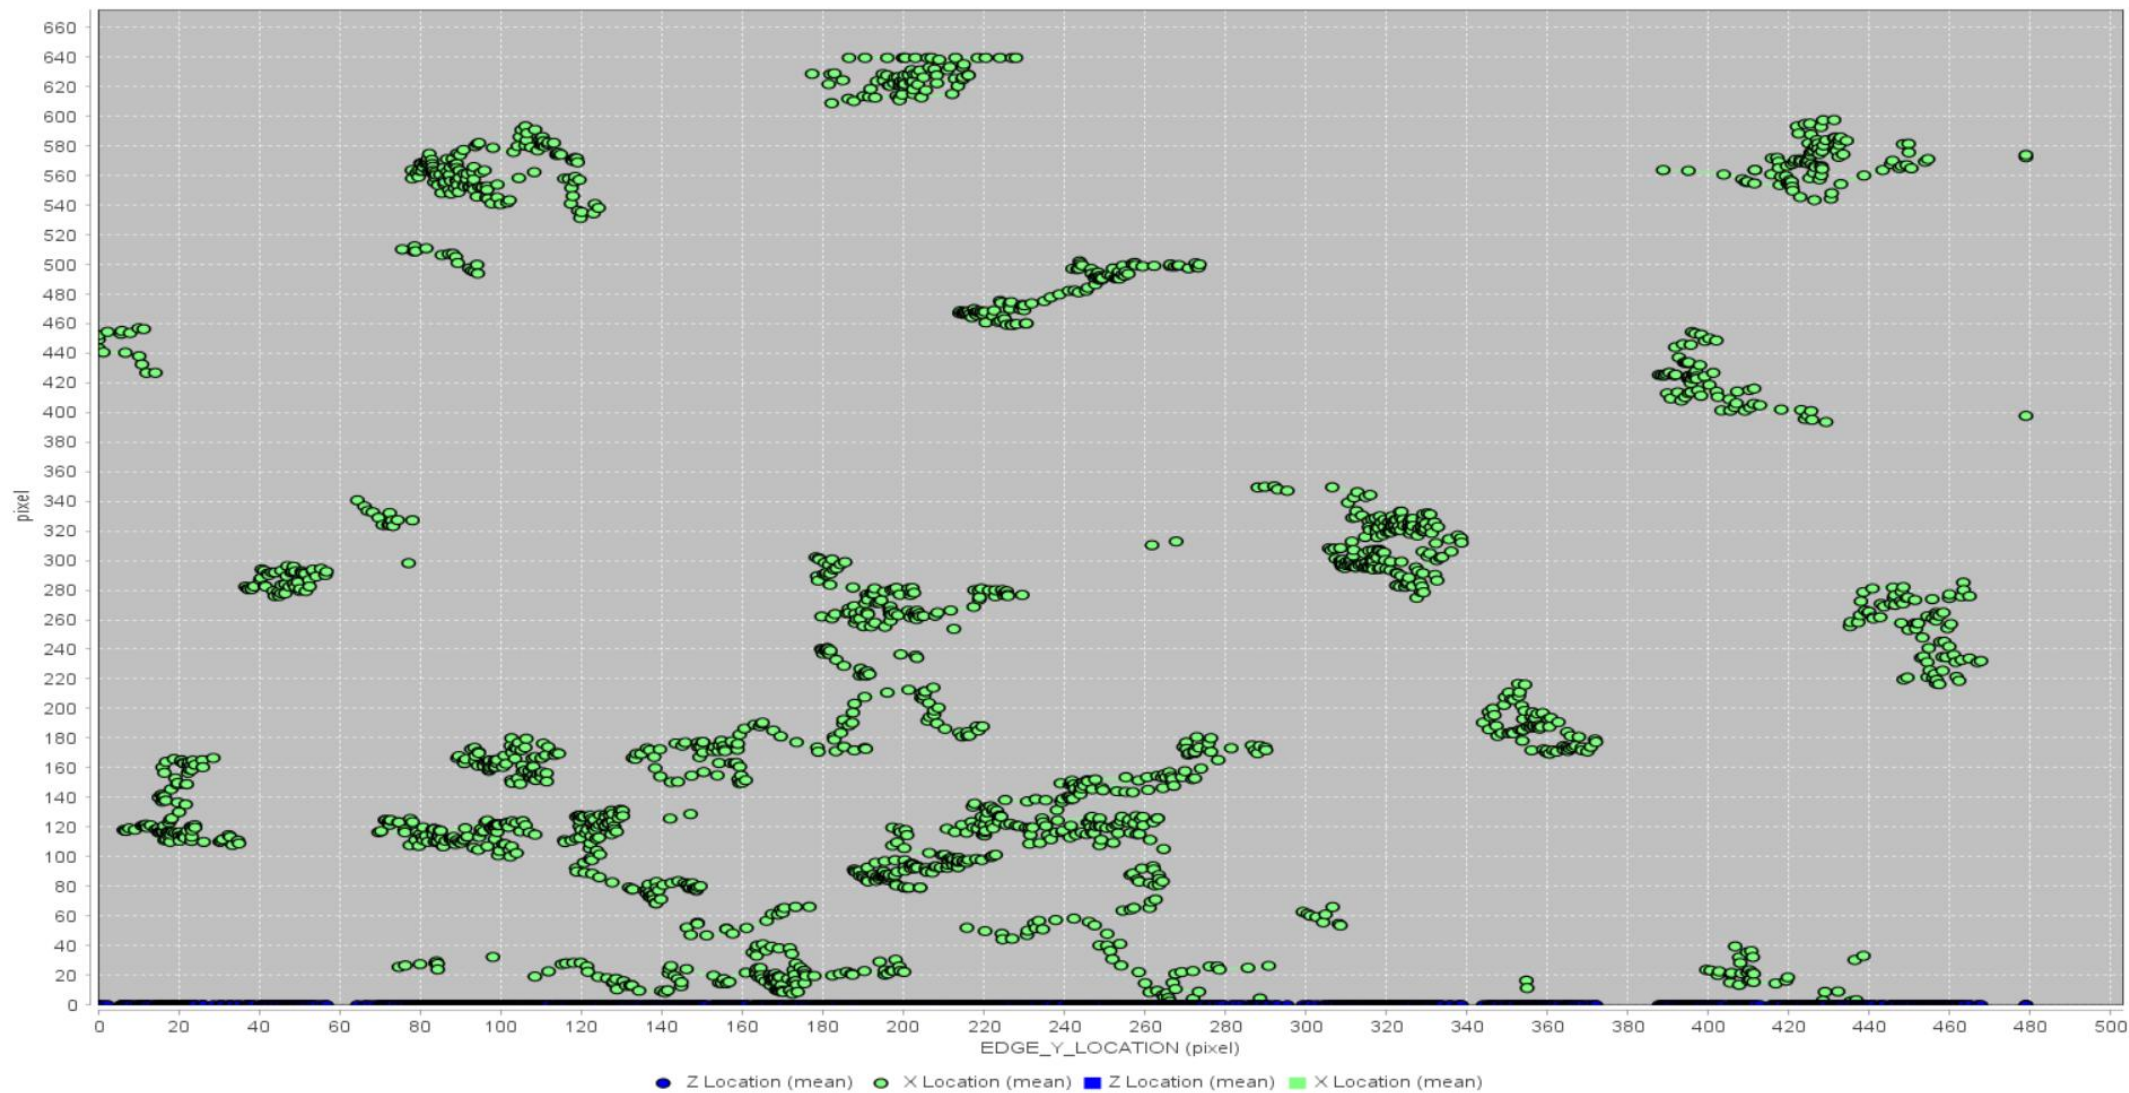

Supplement: s1 [file s1]
